# Supplementary material for: Simulated tri-trophic networks reveal complex relationships between species diversity and interaction diversity
Source: PLOS journal article supplement (doi:10.1371/journal.pone.0193822), 2018-03-26
Supplement: S1 (10.1371/journal.pone.0193822.s001) [file journal.pone.0193822.s001]

**S1 Table:** Direct relationship between species and interaction diversity as estimated by correlation coefficients, and the beta coefficients from linear regressions between species and interaction diversity

| Network | Pearson's<br>Correlation | Beta | R <sup>2</sup> |
|---------|--------------------------|------|----------------|
| PH      | 0.97                     | 0.72 | 0.92           |
| HE      | 0.94                     | 0.66 | 0.87           |
| PHE     | 0.35                     | 0.21 | 0.12           |
